# Supplementary material for: The ozonolysis of isoprene in a cryogenic buffer gas cell by high resolution microwave spectroscopy
Source: Royal Society of Chemistry journal article supplement (doi:10.1039/c8cp02055h), 2018-01-01
Supplement: c8cp02055h1.pdf [file c8cp02055h1.pdf]

# Supplemental Information: The ozonolysis of isoprene in a cryogenic buffer gas cell by high resolution microwave spectroscopy

Jessica P. Porterfield<sup>\*1</sup>, Sandra Eibenberger<sup>†2</sup>, Dave Patterson<sup>3</sup>, and Michael C. McCarthy<sup>1</sup>

<sup>1</sup>Harvard Smithsonian Center for Astrophysics, Cambridge, MA 02138

<sup>2</sup>Harvard University, Cambridge, MA 02138

<sup>3</sup>University of California, Santa Barbara, CA 93106

## 1 Product Ratios with CP-FTMW

The predicted line intensity for one mole of molecules as reported by Bunker and Jensen is<sup>1</sup>:

$$I_{(f \leftarrow i)} = \frac{8\pi^3 \nu_{if} N_A e^{-E_i/kT} (1 - e^{-h\nu_{if}/kT}) S_{if}}{(4\pi\epsilon_0) 3hc^2 Q_{rot}} \quad (1)$$

where  $\nu_{if}$  is the frequency in Hz,  $N_A$  is Avogadro's number,  $S_{ij}$  is the intrinsic line strength for a given transition,  $E_i$  is the lower state energy,  $\epsilon_0$  is the vacuum permittivity constant, and  $Q_{rot}$  is the rotational partition function. The intrinsic line strengths are calculated from simulations in PGOPHER. All products (ap-MACR, ap/sp-MVK, CH<sub>2</sub>=O, and HCOOH) were included in a mixture simulation, and line strengths were exported based upon best fit rotational parameters from Pickett, or the literature as cited below (see Table 2).<sup>2,3</sup>. Rearranging we take the ratio of  $N_1$  to  $N_2$ :

$$\frac{N_1}{N_2} = \frac{e^{-E_2/kT} (1 - e^{-h\nu_2/kT}) \nu_2 S_2 I_1 Q_{rot1}}{e^{-E_1/kT} (1 - e^{-h\nu_1/kT}) \nu_1 S_1 I_2 Q_{rot2}} \quad (2)$$

We have calculated  $Q_{rot}$  at 6.68 K, with rigid-rotor levels being calculated by diagonalization followed by partition function calculation by direct summation:

$$Q_{rot} = \sum_k \exp(-E_k/k_B T) \quad (3)$$

---

\*Email: jessica.porterfield@cfa.harvard.edu

†Present Address: Fritz Haber Institute of the Max Planck Society, Berlin, Germany

A number of lines and their respective constants required for this calculation at 6.68 K are summarized in Table 1. In each calculation the molecules were assumed to be in thermal equilibrium with the measured temperature of the cell, which presumably leads to introduction of systematic error. Although there are many potential approaches to account for differences in instrument response from frequency to frequency, here we have simply validated lines for internal consistency. The ratio of one line to another for the same given species should be 1, and those that deviated more than 20% from this result were thrown out of analysis on account of changes in instrument response.

| Transition                                                     | Frequency (MHz) | $E_i$ (MHz) | $I$ (arb) | $S_{if}$ |
|----------------------------------------------------------------|-----------------|-------------|-----------|----------|
| <i>ap</i> -methyl vinyl ketone ( $3_{12} \rightarrow 2_{11}$ ) | 23481.9751      | 28981.2681  | 0.957     | 5.664812 |
| <i>ap</i> -methyl vinyl ketone ( $4_{04} \rightarrow 3_{13}$ ) | 24423.4119      | 44508.8043  | 0.654     | 3.212288 |
| <i>sp</i> -methyl vinyl ketone ( $4_{04} \rightarrow 3_{13}$ ) | 22386.1804      | 45010.2005  | 1.12      | 7.845789 |
| <i>sp</i> -methyl vinyl ketone ( $4_{23} \rightarrow 4_{14}$ ) | 25870.9216      | 70321.429   | 0.264     | 2.013059 |
| <i>ap</i> -methacrolein ( $3_{03} \rightarrow 2_{02}$ )        | 20950.7446      | 21795.4726  | 4.12      | 6.890302 |
| <i>ap</i> -methacrolein ( $3_{21} \rightarrow 2_{20}$ )        | 23259.2774      | 42125.8447  | 2.44      | 3.975087 |
| formic acid ( $1_{01} \rightarrow 0_{00}$ )                    | 22471.1914      | 0           | 3.09      | 0.644960 |
| formaldehyde ( $2_{11} \rightarrow 2_{12}$ )                   | 14488.4766      | 456785.1436 | 24.4      | 1.510203 |

Table 1: Sample values used in the calculation of MACR/MVK from 2:1 ozone to isoprene ozonolysis data at 4% overall reagent in argon, 298 K and 5 Torr.

| Species                        | $Q_{rot}$ | $\mu / D$                | Ref                                                           |
|--------------------------------|-----------|--------------------------|---------------------------------------------------------------|
| <i>ap</i> -methyl vinyl ketone | 28.537    | a: $2.53 \pm 0.03$       | Foster <sup>4</sup> , Wilcox <sup>5</sup>                     |
|                                |           | b: $1.91 \pm 0.04$       | Foster <sup>4</sup> , Wilcox <sup>5</sup>                     |
| <i>sp</i> -methyl vinyl ketone | 27.786    | a: 0.66                  | Wilcox <sup>5</sup>                                           |
|                                |           | b: 3.19                  | Wilcox <sup>5</sup>                                           |
| <i>ap</i> -methacrolein        | 28.601    | a: $2.67 \pm 0.015$      | Suzuki <sup>6</sup>                                           |
|                                |           | b: $0.84 \pm 0.04$       | Suzuki <sup>6</sup>                                           |
| <i>trans</i> -formic acid      | 6.316     | a: $1.391 \pm 0.005$     | Kim <sup>7</sup> , Willemot <sup>8</sup> , Davis <sup>9</sup> |
|                                |           | b: $0.26 \pm 0.04$       | Kim <sup>7</sup> , Willemot <sup>8</sup> , Davis <sup>9</sup> |
| formaldehyde                   | 2.141     | a: $2.33167 \pm 0.00001$ | Bocquet <sup>10</sup>                                         |

Table 2: Rotational partition functions (at 6.68 K) and dipole moments used in the branching ratio analysis in the ozonolysis of isoprene.

## 2 Reagents and Ozone Purification

Isoprene (Aldrich 99% containing <1000 ppm p-tert-butylcatechol as inhibitor) was diluted to 2% in argon (UHP). Flow rates were chosen to maximize throughput, and therefore pressure, while minimizing heat load on the cold cell. Authentic samples (isoprene, MVK, MACR, and formaldehyde) were used for comparison to the spectra obtained with the isoprene / ozone mixture. Neat samples of MVK (Aldrich 99% containing 0.5% hydroquinone and 0.1% acetic acid as stabilizer) and MACR (Aldrich, 95%) were individually studied by injection through a mass flow controller at 1 sccm. Formaldehyde (Aldrich containing 10-15% methanol

as stabilizer, 37 wt. % in H<sub>2</sub>O) solution was directly injected via a capillary tube into the buffer gas cell at 2  $\mu$ L per minute. All samples were used without further purification.

The standard procedure for pure ozone generation involved the following: High purity O<sub>2</sub> (99.999% Middlesex grade 5.0) was passed through an ozone generator (Welsbach) at 5 psig. The output (conversion efficiency roughly 1.5%) at 2 standard liters per minute was directed into a cold silica gel trap at -78 °C. Argon was then passed through the trap into a collection vessel and filled to atmospheric pressure, with the first few seconds of argon flow vented off to remove residual O<sub>2</sub>. To establish the ozone concentration, ozone absorption was measured with the output of a 255 nm UV LED (3 mW) through a small concentration cell equipped with sapphire windows and a silicon photo-diode (Thorlabs PDA10A). Depletion of ozone in the cylinder at such low dilutions (typically 5% O<sub>3</sub> in Ar) was negligible on the timescale required for data acquisition.

### 3 Additional Estimations

The helium density inside the buffer gas cell is estimated based upon effusive, steady state flow conditions with a mass balance formula<sup>11</sup>:  $n_{He} = \frac{4f}{Av_{He}}$ , for a flow rate  $f$  (7 sccm), cell aperture area (2.85 cm<sup>2</sup>) and the mean He velocity. Mean velocity  $v_{He} = \sqrt{\frac{8k_B T}{\pi m_{He}}}$  is 188 m s<sup>-1</sup> at 6.68 K, and 1 sccm is equivalent to approximately  $4.48 \times 10^{17}$  atoms s<sup>-1</sup>. Therefore He cell density can be estimated as:

$$n_{He} = \frac{4(4.48 \times 10^{17} \text{ atoms/s})(7 \text{ sccm})}{(2.85 \text{ cm}^2)(1.92 \times 10^4)} \quad (4)$$

or approximately  $2 \times 10^{14}$  He atoms cm<sup>-3</sup>. From Houston *et. al.*, If the density of molecules of type 2 (He) is  $n_2^* = n_{He}$ , then the number of collisions one molecule of type 1 will experience with molecules of type 2 per unit time is<sup>12</sup>:

$$Z_{2,1} = \pi b_{max}^2 \langle v_r \rangle n_2^* \quad (5)$$

With  $b_{max}$  representing the approximate impact parameter, or the sum of the collision partner radii. The relative velocity  $\langle v_r \rangle$  of He with products can be calculated by the following:

$$\langle v_r \rangle = \left( \frac{8kT}{\pi\mu} \right)^{1/2} \quad (6)$$

Assuming the approximate average mass of methyl vinyl ketone, methacrolein, and isoprene *etc.* is on the order of 70 g/mol (isoprene 68 g/mol), then the reduced mass for an He / isoprene collision is  $m_1 m_2 / (m_1 + m_2)$  is 3.78 amu. There are  $1.66054 \times 10^{-27}$  kg/amu, so the reduced mass for this collision is

$6.29 \times 10^{-27}$  kg. This leads to an average relative velocity  $\langle v_r \rangle$  of 193 m/s between He and isoprene at 6.68 K. If we assume a hard sphere collisional cross section of He of  $1.4 \times 10^{-10}$  m, and roughly ten times that for the large collision partner, we get an approximate  $b_{max} = 15 \times 10^{-10}$  m. Plugging this into equation 5, we get  $Z_{2,1} = 2.73 \times 10^5$  collisions/s. Within reason we can assume that product/He collisions occur roughly once every 10  $\mu$ s, depending on the hard sphere radius and molar mass assumed for the collision partner with He. Given the assumption that larger molecules are collisionally thermalized within roughly 20 - 100 collisions<sup>13</sup>, we can safely assume thermalization of hot molecules in the buffer gas cell occurs within 1 ms or less. Lastly, we can estimate the residence time, or the time reagents are allowed to mix before entering the buffer gas cell, based upon the following:  $\tau = LA/Q$  With flow rate Q (15 sccm, 96% argon), L total alumina and PFA tube length (115 cm), and A the cross sectional area at the exit of the tube ( $0.017 \text{ cm}^2$ ), we derive a rough estimate of  $\tau = 10$  s for residence time.

## 4 Line lists and constants

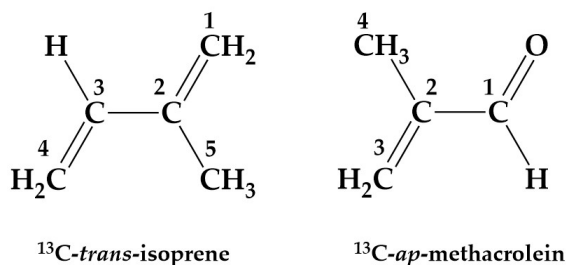

Figure 1: Isotopic labeling of  $^{13}\text{C-trans-isoprene}$  for Tables 3 and 4, and  $^{13}\text{C-ap-methacrolein}$  for Tables 5 and 6.

Table 5: Observed lines (MHz) for the normal and isotopically substituted  $^{13}\text{C}$  ap-methacrolein.

| Transition                  | $^{12}\text{C}$ | $^{13}\text{C}$ 1 | $^{13}\text{C}$ 2 | $^{13}\text{C}$ 3 | $^{13}\text{C}$ 4 |
|-----------------------------|-----------------|-------------------|-------------------|-------------------|-------------------|
| $1_{01} \rightarrow 0_{00}$ | 7368.3          | 7325.4            | 7351.7            | 7217.3            | 7307.9            |
|                             | 7368.5          | 7325.7            | 7352.2            | 7217.6            | 7308.2            |
| $1_{11} \rightarrow 0_{00}$ | 11577.3         | 11503.0           | 11572.6           | 11408.2           | 11245.7           |
| $2_{02} \rightarrow 1_{01}$ | 14426.8799      | 14342.1631        | 14397.4915        | 14139.0076        | 14278.4424        |
|                             | 14427.3071      |                   |                   |                   |                   |
| $2_{11} \rightarrow 1_{10}$ | 16173.9502      | 16081.2988        | 16135.0098        | 15834.5337        | 16079.4678        |
|                             | 16174.7437      | 16082.0923        | 16135.8032        | 15833.8013        | 16078.6743        |
| $2_{12} \rightarrow 1_{11}$ | 13299.0112      | 13220.2148        | 13272.4609        | 13035.2783        | 13153.0151        |
|                             | 13299.2554      | 13220.3979        | 13272.7051        | 13035.5835        | 13153.2593        |
| $2_{12} \rightarrow 1_{01}$ | 17508.0566      | 17397.7661        | 17493.2698        | 17226.2573        |                   |
| $2_{11} \rightarrow 2_{02}$ | 7393.6667       |                   |                   |                   |                   |
|                             | 7394.0667       |                   |                   |                   |                   |
| $2_{20} \rightarrow 2_{11}$ | 12936.1572      | 12840.6982        |                   |                   | 12150.9399        |

*Continued on next page*

Table 5: Observed lines (MHz) for the normal and isotopically substituted  $^{13}\text{C}$  ap-methacrolein.

| Transition                  | $^{12}\text{C}$ | $^{13}\text{C}$ 1 | $^{13}\text{C}$ 2 | $^{13}\text{C}$ 3 | $^{13}\text{C}$ 4 |
|-----------------------------|-----------------|-------------------|-------------------|-------------------|-------------------|
|                             | 12936.8286      | 12841.4307        |                   |                   | 12150.2986        |
| $2_{21} \rightarrow 2_{02}$ | 20020.4443      |                   |                   |                   | 19014.0356        |
|                             | 20020.8716      |                   |                   |                   | 19014.4019        |
| $2_{21} \rightarrow 2_{12}$ |                 | 16824.2798        | 16955.8716        | 16770.3857        |                   |
| $3_{03} \rightarrow 2_{02}$ | 20950.5591      | 20825.3149        | 20912.2900        | 20546.6284        | 20677.1826        |
|                             | 20950.9253      | 20825.6812        | 20912.6562        | 20546.9946        | 20677.4878        |
| $3_{03} \rightarrow 2_{12}$ | 17869.3848      | 17769.5312        |                   |                   | 17865.3564        |
|                             | 17870.1782      | 17770.3247        |                   |                   | 17864.5630        |
| $3_{12} \rightarrow 2_{11}$ | 24041.5625      | 23903.0737        | 23985.5322        |                   | 23876.8296        |
|                             | 24042.6611      | 23904.1724        | 23986.6309        |                   | 23876.8296        |
| $3_{13} \rightarrow 2_{02}$ |                 | 22710.0195        | 22829.7095        | 22471.4914        | 22350.7056        |
| $3_{13} \rightarrow 2_{12}$ | 19771.9702      | 19654.2234        | 19733.8843        | 19384.1528        | 19538.0835        |
|                             | 19772.2754      | 19654.5996        | 19734.1895        | 19384.4580        | 19538.4497        |
| $3_{21} \rightarrow 2_{20}$ | 23258.6646      | 23126.7676        | 23198.7280        |                   | 23170.1636        |
|                             | 23259.8853      | 23127.9883        | 23199.9847        |                   | 23171.4453        |
| $3_{22} \rightarrow 2_{21}$ | 22104.5508      | 21975.9497        | 22055.4175        |                   | 21923.5815        |
|                             | 22105.3442      | 21976.7432        | 22056.2109        |                   | 21924.3750        |
| $3_{12} \rightarrow 3_{03}$ | 10484.7333      |                   |                   |                   |                   |
|                             | 10485.8667      |                   |                   |                   |                   |
| $3_{22} \rightarrow 3_{03}$ | 21174.8633      |                   |                   |                   | 20260.8618        |
| $3_{21} \rightarrow 3_{12}$ | 12153.3813      | 12064.5142        |                   | 12083.0688        |                   |
|                             | 12153.9307      | 12065.0635        |                   | 12083.6182        |                   |
| $3_{22} \rightarrow 3_{13}$ | 19272.2144      | 19145.9937        | 19277.4023        |                   |                   |
|                             | 19272.7026      | 19146.4819        | 19277.8906        |                   |                   |
| $3_{31} \rightarrow 3_{22}$ |                 | 24639.2798        |                   |                   |                   |
| $4_{04} \rightarrow 3_{13}$ | 25076.9019      | 24931.0278        |                   | 24546.5063        | 24904.8437        |
|                             | 25076.1694      | 24931.6992        |                   | 24547.1777        | 24905.5151        |
| $4_{13} \rightarrow 3_{22}$ | 20897.0923      |                   |                   |                   |                   |
|                             | 20899.5337      |                   |                   |                   |                   |
| $4_{13} \rightarrow 4_{04}$ | 15093.1396      | 15013.0615        | 15047.2412        |                   |                   |
|                             | 15095.2759      | 15015.2588        | 15049.4385        |                   |                   |
| $4_{13} \rightarrow 4_{14}$ | 14083.0688      |                   |                   |                   |                   |
|                             | 14085.6323      |                   |                   |                   |                   |
| $4_{14} \rightarrow 3_{13}$ |                 |                   |                   | 25580.1367        | 25755.0635        |
|                             |                 |                   |                   | 25580.5029        | 25755.4297        |
| $4_{22} \rightarrow 4_{13}$ | 12284.7900      |                   |                   |                   |                   |
| $4_{23} \rightarrow 4_{04}$ | 23425.1074      | 23273.1909        |                   |                   | 22647.8247        |
|                             | 23425.8398      | 23273.9233        |                   |                   | 22648.6182        |
| $4_{23} \rightarrow 4_{14}$ | 22415.0366      |                   |                   |                   | 21797.5439        |
|                             | 22416.1353      |                   |                   |                   | 21798.7036        |
| $4_{32} \rightarrow 4_{23}$ | 25569.8828      |                   |                   |                   | 24353.4521        |
|                             | 25570.1880      |                   |                   |                   | 24353.6963        |
| $4_{32} \rightarrow 5_{15}$ |                 |                   | 15812.8052        |                   |                   |
| $5_{14} \rightarrow 5_{05}$ |                 |                   |                   | 20454.9536        |                   |
| $5_{14} \rightarrow 5_{15}$ |                 |                   |                   |                   | 20667.0508        |
|                             |                 |                   |                   |                   | 20670.4077        |
| $5_{23} \rightarrow 4_{32}$ |                 |                   | 18385.0684        |                   |                   |
| $5_{23} \rightarrow 5_{14}$ | 13822.1436      |                   |                   |                   |                   |
|                             | 13822.9980      |                   |                   |                   |                   |

*Continued on next page*

Table 5: Observed lines (MHz) for the normal and isotopically substituted  $^{13}\text{C}$  ap-methacrolein.

| Transition                  | $^{12}\text{C}$ | $^{13}\text{C}$ 1 | $^{13}\text{C}$ 2 | $^{13}\text{C}$ 3 | $^{13}\text{C}$ 4 |
|-----------------------------|-----------------|-------------------|-------------------|-------------------|-------------------|
| $5_{32} \rightarrow 5_{23}$ | 20080.7471      |                   |                   |                   |                   |
|                             | 20082.3950      |                   |                   |                   |                   |
| $6_{24} \rightarrow 6_{15}$ | 17075.8973      |                   |                   |                   |                   |
| $6_{24} \rightarrow 6_{25}$ | 13422.0581      |                   |                   |                   |                   |
|                             | 13425.8423      |                   |                   |                   |                   |
| $6_{25} \rightarrow 5_{32}$ | 14807.7393      |                   |                   |                   |                   |
|                             | 14808.0444      |                   |                   |                   |                   |
| $6_{33} \rightarrow 6_{24}$ | 18644.8340      |                   |                   |                   |                   |
|                             | 18646.1157      |                   |                   |                   |                   |
| $7_{16} \rightarrow 6_{33}$ | 15238.4033      |                   |                   |                   |                   |
|                             | 15238.7085      |                   |                   |                   |                   |
| $7_{26} \rightarrow 6_{33}$ | 17270.8740      |                   |                   |                   |                   |
|                             | 17269.4702      |                   |                   |                   |                   |
| $9_{36} \rightarrow 9_{37}$ | 17963.8062      |                   |                   |                   |                   |
|                             | 17970.2759      |                   |                   |                   |                   |

| Transition                  | $^{13}\text{C}$ 1 | $^{13}\text{C}$ 2 | $^{13}\text{C}$ 3 | $^{13}\text{C}$ 4 | $^{13}\text{C}$ 5 |
|-----------------------------|-------------------|-------------------|-------------------|-------------------|-------------------|
| $1_{10} \rightarrow 1_{01}$ | 5623.3333         | 5679.0000         | 5631.1333         |                   | 5435.9333         |
| $2_{11} \rightarrow 2_{02}$ |                   | 7253.6734         |                   |                   |                   |
| $2_{02} \rightarrow 1_{11}$ |                   | 9411.4677         |                   |                   |                   |
| $3_{12} \rightarrow 3_{03}$ | 9853.4797         | 10019.3211        | 9977.4273         |                   | 9939.1422         |
| $1_{11} \rightarrow 0_{00}$ | 11223.8480        | 11374.9333        | 11300.2877        | 11318.3910        | 11063.0970        |
| $4_{22} \rightarrow 4_{13}$ | 12308.1665        | 12417.4194        | 12305.4810        | 12606.5674        | 11838.6780        |
| $3_{21} \rightarrow 3_{12}$ | 12423.8000        | 12507.2883        | 12377.5712        | 12814.6940        | 11780.1689        |
| $2_{20} \rightarrow 2_{11}$ | 13250.8545        | 13338.3658        | 13198.8525        |                   | 12548.7061        |
| $5_{23} \rightarrow 5_{14}$ |                   |                   |                   | 13490.0513        |                   |
| $4_{13} \rightarrow 4_{04}$ | 13902.7100        | 14172.4854        | 14135.2539        |                   |                   |
| $3_{03} \rightarrow 2_{12}$ | 16440.9519        | 16776.6714        | 16731.6667        | 16190.8484        | 16845.0284        |
| $2_{12} \rightarrow 1_{01}$ | 16824.3471        | 17070.8400        | 16969.4214        | 16901.2597        | 16690.2637        |
| $2_{21} \rightarrow 2_{12}$ | 16869.8730        | 17036.9263        | 16893.3106        | 17206.4209        | 16307.6667        |
| $3_{22} \rightarrow 3_{13}$ |                   |                   |                   |                   | 18488.6279        |
| $4_{13} \rightarrow 3_{22}$ |                   | 18792.5220        |                   |                   |                   |
| $5_{32} \rightarrow 5_{23}$ | 20909.5874        |                   |                   |                   |                   |
| $4_{23} \rightarrow 4_{14}$ | 21744.6704        |                   | 21884.3924        | 21939.9219        |                   |
| $3_{13} \rightarrow 2_{02}$ | 21885.5396        |                   | 22089.8183        |                   | 21764.6877        |
| $4_{23} \rightarrow 4_{14}$ |                   | 22027.9346        |                   |                   | 21428.4473        |
| $3_{13} \rightarrow 2_{02}$ |                   | 22216.7500        |                   | 21953.3405        |                   |
| $4_{31} \rightarrow 4_{22}$ |                   | 22742.1069        | 22492.7173        | 23387.4316        | 21298.0762        |
| $4_{04} \rightarrow 3_{13}$ | 23339.8853        | 23781.5816        | 23697.1851        | 23103.6792        | 23709.5752        |
| $3_{30} \rightarrow 3_{21}$ |                   | 24054.3628        | 23809.0625        | 24600.7495        | 22675.9448        |
| $3_{31} \rightarrow 3_{22}$ | 25036.6066        | 25246.1353        | 25009.5630        |                   | 23973.0029        |
| $4_{32} \rightarrow 4_{23}$ |                   | 25878.3374        | 25646.4648        |                   | 24661.7236        |
| $2_{21} \rightarrow 1_{10}$ |                   | 28428.7982        |                   |                   |                   |
| $2_{20} \rightarrow 1_{11}$ |                   | 30003.5052        |                   |                   |                   |
| $3_{22} \rightarrow 2_{11}$ |                   | 34124.6017        |                   |                   |                   |
| $3_{21} \rightarrow 2_{12}$ |                   | 39303.2896        |                   |                   |                   |

Table 3: Observed lines (MHz) for isotopically substituted  $^{13}\text{C}$  *trans*-isoprene. Reported at  $\pm 50$  KHz from a combination of the buffer gas cell and cavity microwave spectrometers.

|                   | A            | B            | C            | $D_J$    | $D_{JK}$ | Lines | $\sigma$ |
|-------------------|--------------|--------------|--------------|----------|----------|-------|----------|
| $^{12}\text{C}$   | 8527.045(1)  | 4175.236(1)  | 2852.160(1)  | 0.35(3)  | 5.40(5)  | 28    | 0.90     |
| $^{13}\text{C}$ 1 | 8423.58(1)   | 4088.959(3)  | 2800.264(2)  |          | 4.8(6)   | 15    | 0.43     |
| $^{13}\text{C}$ 2 | 8526.9798(1) | 4166.2875(1) | 2847.9742(1) | 0.279(1) | 5.29(1)  | 24    | 0.84     |
| $^{13}\text{C}$ 3 | 8465.715(8)  | 4152.242(3)  | 2834.573(1)  |          | 5.3(6)   | 17    | 0.63     |
| $^{13}\text{C}$ 4 | 8526.96(1)   | 4046.452(6)  | 2791.443(2)  |          | 5.9(7)   | 12    | 0.75     |
| $^{13}\text{C}$ 5 | 8249.520(6)  | 4160.422(3)  | 2813.594(1)  |          | 6.6(4)   | 17    | 0.91     |

Table 4: Rotational (MHz) and centrifugal distortion constants (kHz) for *trans*-isoprene and its  $^{13}\text{C}$  isotopologues, along with the number of lines used in each fit and the error based on weighted averages ( $\sigma$ , kHz).

|                   | A            | B            | C            | D <sub>J</sub> | D <sub>JK</sub> | D <sub>K</sub> | δ <sub>J</sub> | Lines | σ    |
|-------------------|--------------|--------------|--------------|----------------|-----------------|----------------|----------------|-------|------|
| <sup>12</sup> C   | 8611.99(1)   | 4403.025(4)  | 2965.367(4)  | 0.50(6)        | 8.2(4)          |                | 0.53(2)        | 36    | 0.71 |
| <sup>13</sup> C 1 | 8555.59(2)   | 4378.106(6)  | 2947.412(4)  |                | 9(1)            | 6(2)           |                | 21    | 0.65 |
| <sup>13</sup> C 2 | 8612.2766(1) | 4391.6604(1) | 2960.3510(1) | 1.5020(1)      |                 |                | -1.2238(1)     | 17    | 0.89 |
| <sup>13</sup> C 3 | 8499.13(2)   | 4308.33(2)   | 2909.04(1)   | -2.8(4)        |                 |                | -2.9(2)        | 14    | 0.71 |
| <sup>13</sup> C 4 | 8323.21(1)   | 4385.515(7)  | 2933.558(7)  | 0.5(3)         | 7(1)            |                |                | 21    | 0.49 |

Table 6: Rotational (MHz) and centrifugal distortion constants (kHz) for *trans*-methacrolein and its <sup>13</sup>C isotopologues, along with the number of lines used in each fit and the error based on weighted averages (σ, kHz).



## References

- [1] P. R. Bunker and P. Jensen, *Fundamentals of molecular symmetry*, CRC Press, 2004.
- [2] H. Pickett, R. Poynter, E. Cohen, M. Delitsky, J. Pearson and H. Müller, *Journal of Quantitative Spectroscopy and Radiative Transfer*, 1998, **60**, 883–890.
- [3] C. M. Western, *Journal of Quantitative Spectroscopy and Radiative Transfer*, 2017, **186**, 221–242.
- [4] P. D. Foster, V. Rao and R. Curl Jr, *The Journal of Chemical Physics*, 1965, **43**, 1064–1066.
- [5] D. S. Wilcox, A. J. Shirar, O. L. Williams and B. C. Dian, *Chemical Physics Letters*, 2011, **508**, 10–16.
- [6] M. Suzuki and K. Kozima, *Journal of Molecular Spectroscopy*, 1971, **38**, 314–321.
- [7] H. Kim, R. Keller and W. D. Gwinn, *The Journal of Chemical Physics*, 1962, **37**, 2748–2750.
- [8] E. Willemot, D. Dangoisse, N. Monnanteuil and J. Bellet, *Journal of Physical and Chemical Reference Data*, 1980, **9**, 59–160.
- [9] R. W. Davis, A. Robiette, M. Gerry, E. Bjarnov and G. Winnewisser, *Journal of Molecular Spectroscopy*, 1980, **81**, 93–109.
- [10] R. Bocquet, J. Demaison, L. Poteau, M. Liedtke, S. Belov, K. Yamada, G. Winnewisser, C. Gerke, J. Gripp and T. Köhler, *Journal of Molecular Spectroscopy*, 1996, **177**, 154–159.
- [11] G. K. Drayna, *Ph.D. thesis*, Harvard University, 2016.
- [12] P. L. Houston, *Chemical kinetics and reaction dynamics*, Courier Corporation, 2012.
- [13] D. Patterson and J. M. Doyle, *Molecular Physics*, 2012, **110**, 1757–1766.
